# Supplementary material for: Evidence of a deep viral host switch event with beak and feather disease virus infection in rainbow bee-eaters (Merops ornatus)
Source: PubMed Central journal article supplement (PMC4585972; doi:10.1038/srep14511), 2015-09-28
Supplement: srep14511-s1.pdf [file srep14511-s1.pdf]

## SUPPLEMENTARY INFORMATION

### **Evidence of a deep viral host switch event with *beak and feather disease virus* infection in rainbow bee-eaters (*Merops ornatus*)**

Subir Sarker,<sup>1</sup> Kathy G. Moylan,<sup>2</sup> Seyed A. Ghorashi,<sup>1</sup> Jade K. Forwood,<sup>1</sup> Andrew Peters<sup>1</sup> and Shane R. Raidal<sup>1</sup>

<sup>1</sup>Faculty of Science, Charles Sturt University, New South Wales 2678, Australia

<sup>2</sup>Alice Springs Desert Park (K. Moylan), Alice Springs, Northern Territory, 0871, Australia.



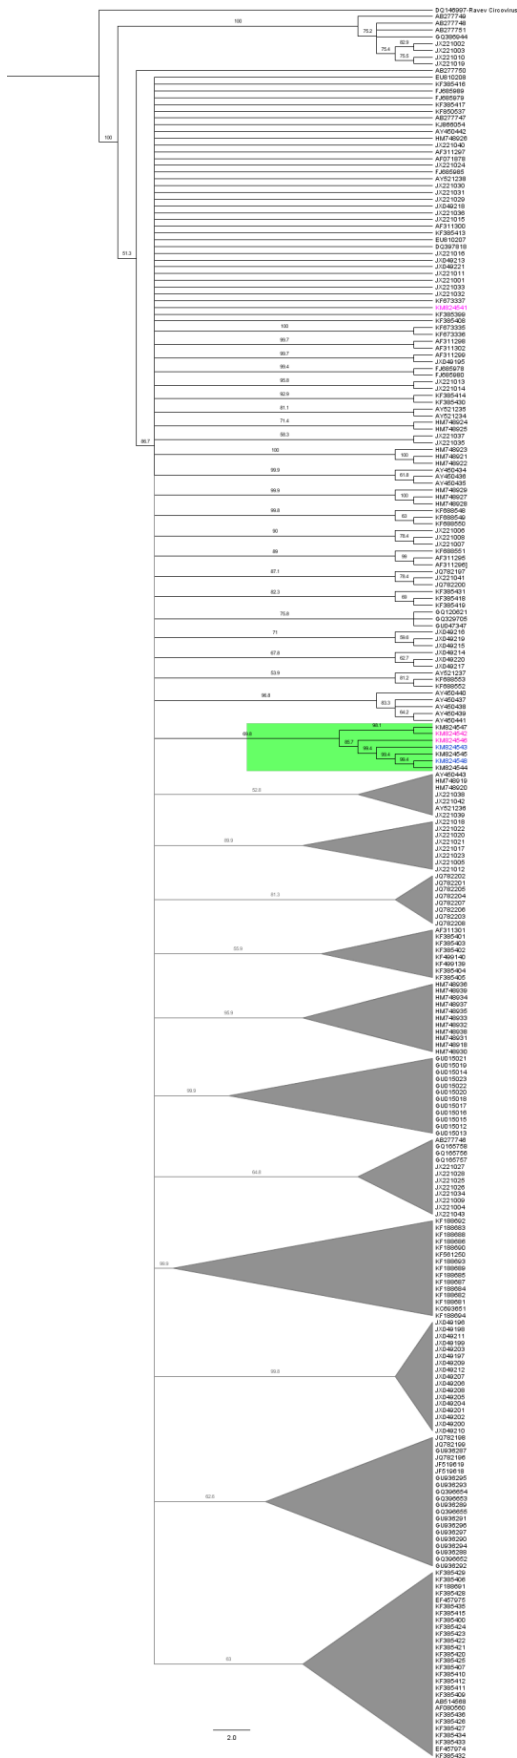

**Figure S2. Outgroup-rooted Neighbour-joining (NJ) tree for evolutionary relationships among partial *Rep* gene sequences of BFDV.** The NJ tree was constructed using partial *Rep* gene sequences of BFDV from rainbow bee-eaters with other equivalent sequences available on GenBank, using 1000 nonparametric bootstrap resamplings. Green text highlighted clade shows all sequences obtained from rainbow bee-eaters. Red and blue colour highlights genotypic variants originated within individual birds 14-1186-02 and 14-1186-04, respectively.

**Table S1.** Sequences used for discovering evolutionary pathway of BFDV in rainbow bee-eaters

| Accession number | Country   | Year of Isolation | Common name               | Host Species                             | Wild/Captive | Reference                   |
|------------------|-----------|-------------------|---------------------------|------------------------------------------|--------------|-----------------------------|
| KM823541         | Australia | 2014              | Rainbow bee-eaters        | <i>Merops ornatus</i>                    | Captive      | This study                  |
| KM823542         | Australia | 2014              | Rainbow bee-eaters        | <i>Merops ornatus</i>                    | Captive      | This study                  |
| KM823543         | Australia | 2014              | Rainbow bee-eaters        | <i>Merops ornatus</i>                    | Captive      | This study                  |
| KM823544         | Australia | 2014              | Rainbow bee-eaters        | <i>Merops ornatus</i>                    | Captive      | This study                  |
| KM823545         | Australia | 2014              | Rainbow bee-eaters        | <i>Merops ornatus</i>                    | Captive      | This study                  |
| KM823546         | Australia | 2014              | Rainbow bee-eaters        | <i>Merops ornatus</i>                    | Captive      | This study                  |
| KM823547         | Australia | 2014              | Rainbow bee-eaters        | <i>Merops ornatus</i>                    | Captive      | This study                  |
| KM823548         | Australia | 2014              | Rainbow bee-eaters        | <i>Merops ornatus</i>                    | Captive      | This study                  |
| KF688548         | Australia | 2013              | Ringneck parrot           | <i>Barnardius zonarius semitorquatus</i> | Wild         | Sarker et al. (unpublished) |
| KF688549         | Australia | 2013              | Ringneck parrot           | <i>Barnardius zonarius semitorquatus</i> | Wild         | Sarker et al. (unpublished) |
| KF688550         | Australia | 2013              | Ringneck parrot           | <i>Barnardius zonarius semitorquatus</i> | Wild         | Sarker et al. (unpublished) |
| KF688551         | Australia | 2013              | Bourke's parrot           | <i>Neopsephotus bourkii</i>              | Wild         | Sarker et al. (unpublished) |
| KF688552         | Australia | 2013              | Golden shoulder parrot    | <i>Psephotus chrysopterygius</i>         | Wild         | Sarker et al. (unpublished) |
| KF688553         | Australia | 2013              | Hooded parrot             | <i>Psephotus dissimilis</i>              | Wild         | Sarker et al. (unpublished) |
| KF673335         | Australia | 2013              | Swift parrot              | <i>Lathamus discolor</i>                 | Wild         | Sarker et al., 2014         |
| KF673336         | Australia | 2013              | Swift parrot              | <i>Lathamus discolor</i>                 | Wild         | Sarker et al., 2014         |
| KF673337         | Australia | 2013              | Red lory                  | <i>Eos bornea</i>                        | Wild         | Sarker et al., 2014         |
| KF188681         | Australia | 2013              | Orange-bellied parrot     | <i>Neophema chrysogaster</i>             | Captive      | Sarker et al., 2014         |
| KF188682         | Australia | 2013              | Orange-bellied parrot     | <i>Neophema chrysogaster</i>             | Captive      | Sarker et al., 2014         |
| KF188683         | Australia | 2013              | Orange-bellied parrot     | <i>Neophema chrysogaster</i>             | Captive      | Sarker et al., 2014         |
| KF188684         | Australia | 2013              | Orange-bellied parrot     | <i>Neophema chrysogaster</i>             | Captive      | Sarker et al., 2014         |
| KF188685         | Australia | 2013              | Orange-bellied parrot     | <i>Neophema chrysogaster</i>             | Captive      | Sarker et al., 2014         |
| KF188686         | Australia | 2013              | Orange-bellied parrot     | <i>Neophema chrysogaster</i>             | Captive      | Sarker et al., 2014         |
| KF188687         | Australia | 2013              | Orange-bellied parrot     | <i>Neophema chrysogaster</i>             | Captive      | Sarker et al., 2014         |
| KF188688         | Australia | 2013              | Orange-bellied parrot     | <i>Neophema chrysogaster</i>             | Captive      | Sarker et al., 2014         |
| KF188689         | Australia | 2013              | Orange-bellied parrot     | <i>Neophema chrysogaster</i>             | Captive      | Sarker et al., 2014         |
| KF188690         | Australia | 2013              | Orange-bellied parrot     | <i>Neophema chrysogaster</i>             | Captive      | Sarker et al., 2014         |
| KF188691         | Australia | 2013              | Orange-bellied parrot     | <i>Neophema chrysogaster</i>             | Captive      | Sarker et al., 2014         |
| KF188692         | Australia | 2013              | Orange-bellied parrot     | <i>Neophema chrysogaster</i>             | Captive      | Sarker et al., 2014         |
| KF188693         | Australia | 2013              | Orange-bellied parrot     | <i>Neophema chrysogaster</i>             | Captive      | Sarker et al., 2014         |
| KF188694         | Australia | 2013              | Orange-bellied parrot     | <i>Neophema chrysogaster</i>             | Captive      | Sarker et al., 2014         |
| KC693651         | Australia | 2013              | Orange-bellied parrot     | <i>Neophema chrysogaster</i>             | Wild         | Peters et al., 2014         |
| KF561250         | Australia | 2013              | Orange-bellied parrot     | <i>Neophema chrysogaster</i>             | Wild         | Sarker et al., 2014         |
| KF385399         | Australia | 2013              | Red-tailed black cockatoo | <i>Calyptorhynchus banksii</i>           | Wild         | Sarker et al., 2014         |
| KF385400         | Australia | 2013              | Red-tailed black cockatoo | <i>Calyptorhynchus banksii</i>           | Wild         | Sarker et al., 2014         |
| KF385401         | Australia | 2013              | Gang-gang cockatoo        | <i>Callocephalon fimbriatum</i>          | Captive      | Sarker et al., 2014         |
| KF385402         | Australia | 2013              | Gang-gang cockatoo        | <i>Callocephalon fimbriatum</i>          | Captive      | Sarker et al., 2014         |
| KF385403         | Australia | 2013              | Gang-gang cockatoo        | <i>Callocephalon fimbriatum</i>          | Captive      | Sarker et al., 2014         |
| KF385404         | Australia | 2013              | Gang-gang cockatoo        | <i>Callocephalon fimbriatum</i>          | Wild         | Sarker et al., 2014         |
| KF385405         | Australia | 2013              | Gang-gang cockatoo        | <i>Callocephalon fimbriatum</i>          | Wild         | Sarker et al., 2014         |
| KF385406         | Australia | 2013              | Major Mitchell's cockatoo | <i>Lophochroa leadbeateri</i>            | Captive      | Sarker et al., 2014         |
| KF385407         | Australia | 2013              | Major Mitchell's cockatoo | <i>Lophochroa leadbeateri</i>            | Captive      | Sarker et al., 2014         |
| AF311300         | Australia | 2000              | Major Mitchell's cockatoo | <i>Lophochroa leadbeateri</i>            | Captive      | Bassami et al., 2001        |
| KF385408         | Australia | 2013              | Glossy black cockatoo     | <i>Calyptorhynchus lathami</i>           | Captive      | Sarker et al., 2014         |

|           |              |      |                             |                                    |         |                              |
|-----------|--------------|------|-----------------------------|------------------------------------|---------|------------------------------|
| KF385409  | Australia    | 2013 | Glossy black cockatoo       | <i>Calyptorhynchus lathami</i>     | Captive | Sarker et al., 2014          |
| KF385410  | Australia    | 2013 | Glossy black cockatoo       | <i>Calyptorhynchus lathami</i>     | Captive | Sarker et al., 2014          |
| KF385411  | Australia    | 2013 | Glossy black cockatoo       | <i>Calyptorhynchus lathami</i>     | Captive | Sarker et al., 2014          |
| KF385412  | Australia    | 2013 | Glossy black cockatoo       | <i>Calyptorhynchus lathami</i>     | Captive | Sarker et al., 2014          |
| KF385413  | Australia    | 2013 | Sulphur-crested cockatoo    | <i>Cacatua galerita</i>            | Captive | Sarker et al., 2014          |
| KF385414  | Australia    | 2013 | Sulphur-crested cockatoo    | <i>Cacatua galerita</i>            | Captive | Sarker et al., 2014          |
| KF385415  | Australia    | 2013 | Sulphur-crested cockatoo    | <i>Cacatua galerita</i>            | Captive | Sarker et al., 2014          |
| KF385416  | Australia    | 2013 | Sulphur-crested cockatoo    | <i>Cacatua galerita</i>            | Wild    | Sarker et al., 2014          |
| KF385417  | Australia    | 2013 | Sulphur-crested cockatoo    | <i>Cacatua galerita</i>            | Wild    | Sarker et al., 2014          |
| KF385418  | Australia    | 2013 | Sulphur-crested cockatoo    | <i>Cacatua galerita</i>            | Wild    | Sarker et al., 2014          |
| KF385419  | Australia    | 2013 | Sulphur-crested cockatoo    | <i>Cacatua galerita</i>            | Wild    | Sarker et al., 2014          |
| AF080560  | Australia    | 1998 | Sulphur-crested cockatoo    | <i>Cacatua galerita</i>            | Captive | Bassami et al., 1998         |
| AF311301  | Australia    | 2000 | Sulphur-crested cockatoo    | <i>Cacatua galerita</i>            | Wild    | Bassami et al., 2001         |
| AF311302  | Australia    | 2000 | Sulphur-crested cockatoo    | <i>Cacatua galerita</i>            | Captive | Bassami et al., 2001         |
| AY450436  | South Africa | 2003 | White cockatoo              | <i>Cacatua alba</i>                | Captive | Heath et al., 2004           |
| GU015022  | Thailand     | 2006 | Palm cockatoo               | <i>Probosciger aterrimus</i>       | Captive | Sariya et al., (unpublished) |
| FJ685980  | Thailand     | 2006 | Blue-and-yellow macaw       | <i>Ara ararauna</i>                | Captive | Sariya et al., (unpublished) |
| FJ685978  | Thailand     | 2005 | Yellow-crested cockatoo     | <i>Cacatua sulphurea</i>           | Captive | Sariya et al., (unpublished) |
| FJ685979  | Thailand     | 2005 | Yellow-crested cockatoo     | <i>Cacatua sulphurea</i>           | Captive | Sariya et al., (unpublished) |
| FJ685989  | Thailand     | 2006 | Salmon-crested cockatoo     | <i>Cacatua moluccensis</i>         | Captive | Sariya et al., (unpublished) |
| KF385420  | Australia    | 2013 | Long-billed corella         | <i>Cacatua tenuirostris</i>        | Wild    | Sarker et al., 2014          |
| KF385421  | Australia    | 2013 | Long-billed corella         | <i>Cacatua tenuirostris</i>        | Wild    | Sarker et al., 2014          |
| KF385422  | Australia    | 2013 | Long-billed corella         | <i>Cacatua tenuirostris</i>        | Wild    | Sarker et al., 2014          |
| KF385423  | Australia    | 2013 | Long-billed corella         | <i>Cacatua tenuirostris</i>        | Wild    | Sarker et al., 2014          |
| KF385424  | Australia    | 2013 | Long-billed corella         | <i>Cacatua tenuirostris</i>        | Wild    | Sarker et al., 2014          |
| KF385425  | Australia    | 2013 | Long-billed corella         | <i>Cacatua tenuirostris</i>        | Wild    | Sarker et al., 2014          |
| KF385426  | Australia    | 2013 | Long-billed corella         | <i>Cacatua tenuirostris</i>        | Wild    | Sarker et al., 2014          |
| KF385427  | Australia    | 2013 | Long-billed corella         | <i>Cacatua tenuirostris</i>        | Wild    | Sarker et al., 2014          |
| KF385428  | Australia    | 2013 | Long-billed corella         | <i>Cacatua tenuirostris</i>        | Wild    | Sarker et al., 2014          |
| KF385429  | Australia    | 2013 | Long-billed corella         | <i>Cacatua tenuirostris</i>        | Wild    | Sarker et al., 2013          |
| AF311297  | Australia    | 2000 | Eastern long-billed corella | <i>Cacatua tenuirostris</i>        | Captive | Bassami et al., 2001         |
| KF385430  | Australia    | 2013 | Galah                       | <i>Eolophus roseicapillus</i>      | Captive | Sarker et al., 2014          |
| KF385431  | Australia    | 2013 | Galah                       | <i>Eolophus roseicapillus</i>      | Wild    | Sarker et al., 2014          |
| KF385432  | Australia    | 2013 | Galah                       | <i>Eolophus roseicapillus</i>      | Wild    | Sarker et al., 2014          |
| KF385433  | Australia    | 2013 | Galah                       | <i>Eolophus roseicapillus</i>      | Captive | Sarker et al., 2014          |
| KF385434  | Australia    | 2013 | Galah                       | <i>Eolophus roseicapillus</i>      | Captive | Sarker et al., 2014          |
| KF385435  | Australia    | 2013 | Galah                       | <i>Eolophus roseicapillus</i>      | Wild    | Sarker et al., 2014          |
| KF385436  | Australia    | 2013 | Galah                       | <i>Eolophus roseicapillus</i>      | Captive | Sarker et al., 2014          |
| AF311298  | Australia    | 2000 | Galah                       | <i>Eolophus roseicapillus</i>      | Captive | Bassami et al., 2001         |
| EF457974  | Australia    | 2007 | Cockatiel                   | <i>Nymphicus hollandicus</i>       | Captive | Shearer et al., 2008         |
| EF457975  | Australia    | 2007 | Cockatiel                   | <i>Nymphicus hollandicus</i>       | Captive | Shearer et al., 2008         |
| AB514568  | Japan        | 2010 | Cockatiel                   | <i>Nymphicus hollandicus</i>       | Captive | Kotah et al., 2010           |
| AY450434  | South Africa | 2003 | White-bellied caique        | <i>Pionites leucogaster</i>        | Captive | Heath et al., 2004           |
| AF071878  | USA          | 1998 | Unknown (pooled blood)      | <i>Unknown</i>                     | Captive | Niagro et al., 1998          |
| NC_001944 | USA          | 1998 | Unknown (pooled blood)      | <i>Unknown</i>                     | Captive | Niagro et al., 1998          |
| GQ396652  | New Zealand  | 2008 | Red-fronted parakeet        | <i>Cyanoramphus novaezelandiae</i> | Wild    | Ortiz-Catedral et al., 2010  |
| GQ396653  | New Zealand  | 2008 | Red-fronted parakeet        | <i>Cyanoramphus novaezelandiae</i> | Wild    | Ortiz-Catedral et al., 2010  |
| GQ396656  | New Zealand  | 2008 | Red-fronted parakeet        | <i>Cyanoramphus novaezelandiae</i> | Wild    | Ortiz-Catedral et al., 2010  |

|          |                |      |                            |                                    |         |                              |
|----------|----------------|------|----------------------------|------------------------------------|---------|------------------------------|
| GQ396654 | New Zealand    | 2008 | Red-fronted parakeet       | <i>Cyanoramphus novaezelandiae</i> | Wild    | Ortiz-Catedral et al., 2010  |
| GQ396655 | New Zealand    | 2008 | Red-fronted parakeet       | <i>Cyanoramphus novaezelandiae</i> | Wild    | Ortiz-Catedral et al., 2010  |
| GU936291 | New Zealand    | 2008 | Red-fronted parakeet       | <i>Cyanoramphus novaezelandiae</i> | Wild    | Massaso et al., 2012         |
| GU936292 | New Zealand    | 2008 | Red-fronted parakeet       | <i>Cyanoramphus novaezelandiae</i> | Wild    | Massaso et al., 2012         |
| GU936297 | New Zealand    | 2008 | Red-fronted parakeet       | <i>Cyanoramphus novaezelandiae</i> | Wild    | Massaso et al., 2012         |
| JF519618 | New Zealand    | 2010 | Red-fronted parakeet       | <i>Cyanoramphus novaezelandiae</i> | Wild    | Massaso et al., 2012         |
| GU936296 | New Zealand    | 2008 | Red-fronted parakeet       | <i>Cyanoramphus novaezelandiae</i> | Wild    | Massaso et al., 2012         |
| GU936295 | New Zealand    | 2008 | Red-fronted parakeet       | <i>Cyanoramphus novaezelandiae</i> | Wild    | Massaso et al., 2012         |
| GU936294 | New Zealand    | 2008 | Red-fronted parakeet       | <i>Cyanoramphus novaezelandiae</i> | Wild    | Massaso et al., 2012         |
| GU936290 | New Zealand    | 2008 | Red-fronted parakeet       | <i>Cyanoramphus novaezelandiae</i> | Wild    | Massaso et al., 2012         |
| GU936288 | New Zealand    | 2008 | Red-fronted parakeet       | <i>Cyanoramphus novaezelandiae</i> | Wild    | Massaso et al., 2012         |
| GU936293 | New Zealand    | 2008 | Red-fronted parakeet       | <i>Cyanoramphus novaezelandiae</i> | Wild    | Massaso et al., 2012         |
| GU936289 | New Zealand    | 2008 | Red-fronted parakeet       | <i>Cyanoramphus novaezelandiae</i> | Wild    | Massaso et al., 2012         |
| JF519619 | New Zealand    | 2010 | Eastern rosella            | <i>Platycercus eximius</i>         | Wild    | Massaso et al., 2012         |
| JQ782196 | New Zealand    | 2010 | Eastern rosella            | <i>Platycercus eximius</i>         | Wild    | Massaso et al., 2012         |
| GU936287 | New Zealand    | 2008 | Eastern rosella            | <i>Platycercus eximius</i>         | Wild    | Massaso et al., 2012         |
| JQ782198 | New Zealand    | 2010 | Eastern rosella            | <i>Platycercus eximius</i>         | Wild    | Massaso et al., 2012         |
| JQ782199 | New Zealand    | 2010 | Eastern rosella            | <i>Platycercus eximius</i>         | Wild    | Massaso et al., 2012         |
| JQ782197 | New Zealand    | 2010 | Eastern rosella            | <i>Platycercus eximius</i>         | Wild    | Massaso et al., 2012         |
| JQ782200 | New Zealand    | 2010 | Eastern rosella            | <i>Platycercus eximius</i>         | Wild    | Massaso et al., 2012         |
| AF311295 | Australia      | 2000 | Bluebonnet                 | <i>Psephotus haematogaster</i>     | Captive | Bassami et al., 2001         |
| AF311296 | Australia      | 2000 | Rosey-faced lovebird       | <i>Agapornis roseicollis</i>       | Captive | Bassami et al., 2001         |
| AY521235 | United Kingdom | 2004 | Rosey-faced lovebird       | <i>Agapornis roseicollis</i>       | Captive | de Kloet & de Kloet, 2004    |
| FJ685985 | Thailand       | 2005 | Lovebird                   | <i>Agapornis sp</i>                | Captive | Sariya et al., (unpublished) |
| AY450442 | Zambia         | 2003 | Black-cheeked lovebird     | <i>Agapornis personata</i>         | Captive | Heath et al., 2004           |
| AY450435 | South Africa   | 2003 | African grey parrot        | <i>Psittacus erithacus</i>         | Captive | Heath et al., 2004           |
| GU015023 | Thailand       | 2006 | Great green macaw          | <i>Ara ambigua</i>                 | Captive | Sariya et al., (unpublished) |
| GU015020 | Thailand       | 2006 | Eclectus parrot            | <i>Eclectus roratus</i>            | Captive | Sariya et al., (unpublished) |
| GU015014 | Thailand       | 2006 | Alexandrian parrot         | <i>Psittacula eupatria</i>         | Captive | Sariya et al., (unpublished) |
| GU015012 | Thailand       | 2006 | African grey parrot        | <i>Psittacus erithacus</i>         | Captive | Sariya et al., (unpublished) |
| GU015013 | Thailand       | 2006 | African grey parrot        | <i>Psittacus erithacus</i>         | Captive | Sariya et al., (unpublished) |
| GU015018 | Thailand       | 2006 | Red-shouldered macaw       | <i>Ara nobilis</i>                 | Captive | Sariya et al., (unpublished) |
| GU015015 | Thailand       | 2006 | Alexandrian parrot         | <i>Psittacula eupatria</i>         | Captive | Sariya et al., (unpublished) |
| GU015016 | Thailand       | 2006 | Alexandrian parrot         | <i>Psittacula eupatria</i>         | Captive | Sariya et al., (unpublished) |
| GU015017 | Thailand       | 2006 | Severe macaw               | <i>Ara severa</i>                  | Captive | Sariya et al., (unpublished) |
| GU015021 | Thailand       | 2006 | Red and green macaw        | <i>Ara chloropterus</i>            | Captive | Sariya et al., (unpublished) |
| GU015019 | Thailand       | 2006 | Eclectus parrot            | <i>Eclectus roratus</i>            | Captive | Sariya et al., (unpublished) |
| AY521234 | USA            | 2004 | Ring necked parakeet       | <i>Psittacula kramerii</i>         | Captive | de Kloet & de Kloet, 2004    |
| HM748929 | South Africa   | 2008 | Ring necked parakeet       | <i>Psittacula krameri</i>          | Captive | Varsani et al., 2011         |
| HM748927 | South Africa   | 2008 | Ring necked parakeet       | <i>Psittacula krameri</i>          | Captive | Varsani et al., 2011         |
| HM748928 | South Africa   | 2008 | Ring necked parakeet       | <i>Psittacula krameri</i>          | Captive | Varsani et al., 2011         |
| AY450437 | South Africa   | 2003 | Cape parrot                | <i>Poicephalus robustus</i>        | Captive | Heath et al., 2004           |
| AY450438 | South Africa   | 2003 | Cape parrot                | <i>Poicephalus robustus</i>        | Captive | Heath et al., 2004           |
| AY450439 | South Africa   | 2003 | Ruppell's parrot           | <i>Poicephalus rueppelli</i>       | Captive | Heath et al., 2004           |
| AY450440 | South Africa   | 2003 | African red-bellied parrot | <i>Poicephalus rufiventris</i>     | Captive | Heath et al., 2004           |
| DQ397818 | South Africa   | 2006 | Cape parrot                | <i>Poicephalus robustus</i>        | Captive | Heath et al., 2004           |
| HM748939 | South Africa   | 2007 | Cape parrot                | <i>Poicephalus robustus</i>        | Captive | Varsani et al., 2011         |
| HM748936 | South Africa   | 2007 | Cape parrot                | <i>Poicephalus robustus</i>        | Captive | Varsani et al., 2011         |

|          |               |      |                         |                                            |         |                                      |
|----------|---------------|------|-------------------------|--------------------------------------------|---------|--------------------------------------|
| HM748935 | South Africa  | 2008 | Cape parrot             | <i>Poicephalus robustus</i>                | Captive | Varsani et al., 2011                 |
| HM748918 | South Africa  | 2008 | Cape parrot             | <i>Poicephalus robustus</i>                | Captive | Varsani et al., 2011                 |
| HM748930 | South Africa  | 2008 | Cape parrot             | <i>Poicephalus robustus</i>                | Captive | Varsani et al., 2011                 |
| HM748938 | South Africa  | 2007 | Cape parrot             | <i>Poicephalus robustus</i>                | Captive | Varsani et al., 2011                 |
| HM748931 | South Africa  | 2008 | African grey parrot     | <i>Psittacus erithacus</i>                 | Captive | Varsani et al., 2011                 |
| HM748933 | South Africa  | 2008 | Cape parrot             | <i>Poicephalus robustus</i>                | Captive | Varsani et al., 2011                 |
| HM748932 | South Africa  | 2008 | Cape parrot             | <i>Poicephalus robustus</i>                | Captive | Varsani et al., 2011                 |
| HM748937 | South Africa  | 2007 | Cape parrot             | <i>Poicephalus robustus</i>                | Captive | Varsani et al., 2011                 |
| HM748924 | South Africa  | 2008 | Amazon parrot           | <i>Amazona sp.</i>                         | Captive | Varsani et al., 2011                 |
| HM748925 | South Africa  | 2008 | Amazon parrot           | <i>Amazona sp.</i>                         | Captive | Varsani et al., 2011                 |
| HM748926 | South Africa  | 2008 | Eclectus parrot         | <i>Eclectus roratus</i>                    | Captive | Varsani et al., 2011                 |
| JX049197 | New Caledonia | 2011 | Coconut Lorikeet        | <i>Trichoglossus haematodus deplanchii</i> | Captive | Julian et al., 2012                  |
| JX049198 | New Caledonia | 2011 | Coconut Lorikeet        | <i>Trichoglossus haematodus deplanchii</i> | Captive | Julian et al., 2012                  |
| JX049200 | New Caledonia | 2011 | Coconut Lorikeet        | <i>Trichoglossus haematodus deplanchii</i> | Captive | Julian et al., 2012                  |
| JX049201 | New Caledonia | 2011 | Coconut Lorikeet        | <i>Trichoglossus haematodus deplanchii</i> | Captive | Julian et al., 2012                  |
| JX049202 | New Caledonia | 2011 | Coconut Lorikeet        | <i>Trichoglossus haematodus deplanchii</i> | Captive | Julian et al., 2012                  |
| JX049203 | New Caledonia | 2011 | Coconut Lorikeet        | <i>Trichoglossus haematodus deplanchii</i> | Captive | Julian et al., 2012                  |
| JX049205 | New Caledonia | 2011 | Coconut Lorikeet        | <i>Trichoglossus haematodus deplanchii</i> | Captive | Julian et al., 2012                  |
| JX049206 | New Caledonia | 2011 | Coconut Lorikeet        | <i>Trichoglossus haematodus deplanchii</i> | Captive | Julian et al., 2012                  |
| JX049207 | New Caledonia | 2011 | Coconut Lorikeet        | <i>Trichoglossus haematodus deplanchii</i> | Captive | Julian et al., 2012                  |
| JX049208 | New Caledonia | 2011 | Coconut Lorikeet        | <i>Trichoglossus haematodus deplanchii</i> | Captive | Julian et al., 2012                  |
| JX049209 | New Caledonia | 2011 | Coconut Lorikeet        | <i>Trichoglossus haematodus deplanchii</i> | Captive | Julian et al., 2012                  |
| JX049210 | New Caledonia | 2011 | Coconut Lorikeet        | <i>Trichoglossus haematodus deplanchii</i> | Captive | Julian et al., 2012                  |
| JX049211 | New Caledonia | 2011 | Coconut Lorikeet        | <i>Trichoglossus haematodus deplanchii</i> | Captive | Julian et al., 2012                  |
| JX049212 | New Caledonia | 2011 | Coconut Lorikeet        | <i>Trichoglossus haematodus deplanchii</i> | Captive | Julian et al., 2012                  |
| JX049213 | New Caledonia | 2011 | Eclectus parrot         | <i>Eclectus roratus</i>                    | Captive | Julian et al., 2012                  |
| JX049214 | New Caledonia | 2011 | Eclectus parrot         | <i>Eclectus roratus</i>                    | Captive | Julian et al., 2012                  |
| JX049215 | New Caledonia | 2011 | Eclectus parrot         | <i>Eclectus roratus</i>                    | Captive | Julian et al., 2012                  |
| JX049216 | New Caledonia | 2011 | Eclectus parrot         | <i>Eclectus roratus</i>                    | Captive | Julian et al., 2012                  |
| JX049217 | New Caledonia | 2011 | Eclectus parrot         | <i>Eclectus roratus</i>                    | Captive | Julian et al., 2012                  |
| JX049218 | New Caledonia | 2011 | Eclectus parrot         | <i>Eclectus roratus</i>                    | Captive | Julian et al., 2012                  |
| JX049219 | New Caledonia | 2011 | Red-rumped Parrot       | <i>Psephotus haematotonotus</i>            | Captive | Julian et al., 2012                  |
| JX049220 | New Caledonia | 2011 | New Caledonian Parakeet | <i>Cyanoramphus saissetti</i>              | Captive | Julian et al., 2012                  |
| JX049221 | New Caledonia | 2011 | Eclectus parrot         | <i>Eclectus roratus</i>                    | Captive | Julian et al., 2012                  |
| JX049196 | New Caledonia | 2011 | Coconut lorikeet        | <i>Trichoglossus haematodus deplanchii</i> | Captive | Julian et al., 2012                  |
| JX049199 | New Caledonia | 2011 | Coconut lorikeet        | <i>Trichoglossus haematodus deplanchii</i> | Captive | Julian et al., 2012                  |
| JX049204 | New Caledonia | 2011 | Coconut lorikeet        | <i>Trichoglossus haematodus deplanchii</i> | Captive | Julian et al., 2012                  |
| JX049195 | Australia     | 2009 | Rainbow lorikeet        | <i>Trichoglossus haematodus</i>            | Captive | Julian et al., 2012                  |
| AF311299 | Australia     | 2000 | Rainbow lorikeet        | <i>Trichoglossus haematodus</i>            | Captive | Bassami et al., 2001                 |
| GQ329705 | Portugal      | 2009 | African grey parrot     | <i>Psittacus erithacus</i>                 | Captive | Henriques and Feveiro, (unpublished) |
| GU047347 | Portugal      | 2009 | African grey parrot     | <i>Psittacus erithacus</i>                 | Captive | Henriques and Feveiro, (unpublished) |
| GQ120621 | Portugal      | 2008 | African grey parrot     | <i>Psittacus erithacus</i>                 | Captive | Henriques and Feveiro, (unpublished) |
| EU810207 | Portugal      | 2008 | African grey parrot     | <i>Psittacus erithacus</i>                 | Captive | Henriques and Feveiro, (unpublished) |
| EU810208 | Portugal      | 2005 | African grey parrot     | <i>Psittacus erithacus</i>                 | Captive | Henriques and Feveiro, (unpublished) |
| AY521237 | Germany       | 2004 | African grey parrot     | <i>Psittacus erithacus</i>                 | Captive | de Kloet & de Kloet, 2004            |
| AY450443 | South Africa  | 2003 | African grey parrot     | <i>Psittacus erithacus</i>                 | Captive | Heath et al., 2004                   |
| AY521236 | Portugal      | 2004 | African grey parrot     | <i>Psittacus erithacus</i>                 | Captive | de Kloet & de Kloet, 2004            |
| HM748920 | South Africa  | 2008 | African grey parrot     | <i>Psittacus erithacus</i>                 | Captive | Varsani et al., 2011                 |

|          |              |      |                         |                                       |         |                              |
|----------|--------------|------|-------------------------|---------------------------------------|---------|------------------------------|
| AY450441 | South Africa | 2003 | Jardine parrot          | <i>Poicephalus gulielmi massaicus</i> | Captive | Heath et al., 2004           |
| HM748919 | South Africa | 2008 | Jardine parrot          | <i>Poicephalus gulielmi massaicus</i> | Captive | Varsani et al., 2011         |
| HM748921 | South Africa | 2008 | Jardine parrot          | <i>Poicephalus gulielmi massaicus</i> | Captive | Varsani et al., 2011         |
| HM748922 | South Africa | 2008 | Jardine parrot          | <i>Poicephalus gulielmi massaicus</i> | Captive | Varsani et al., 2011         |
| HM748923 | South Africa | 2008 | Jardine parrot          | <i>Poicephalus gulielmi massaicus</i> | Captive | Varsani et al., 2011         |
| GQ165757 | South Africa | 2008 | Budgerigar              | <i>Melopsittacus undulatus</i>        | Captive | Varsani et al., 2010         |
| GQ165758 | South Africa | 2008 | Budgerigar              | <i>Melopsittacus undulatus</i>        | Captive | Varsani et al., 2010         |
| GQ165756 | South Africa | 2008 | Budgerigar              | <i>Melopsittacus undulatus</i>        | Captive | Varsani et al., 2010         |
| AB277747 | Japan        | 2006 | Budgerigar              | <i>Melopsittacus undulatus</i>        | Captive | Ogawa et al., 2010           |
| AB277746 | Japan        | 2006 | Budgerigar              | <i>Melopsittacus undulatus</i>        | Captive | Ogawa et al., 2010           |
| AB277748 | Japan        | 2006 | Budgerigar              | <i>Melopsittacus undulatus</i>        | Captive | Ogawa et al., 2010           |
| AB277749 | Japan        | 2006 | Budgerigar              | <i>Melopsittacus undulatus</i>        | Captive | Ogawa et al., 2010           |
| AB277750 | Japan        | 2006 | Budgerigar              | <i>Melopsittacus undulatus</i>        | Captive | Ogawa et al., 2010           |
| AB277751 | Japan        | 2006 | Budgerigar              | <i>Melopsittacus undulatus</i>        | Captive | Ogawa et al., 2010           |
| GQ386944 | China        | 2008 | Budgerigar              | <i>Melopsittacus undulatus</i>        | Captive | Zhuang et al., (unpublished) |
| AY521234 | USA          | 2004 | Ring-necked parakeet    | <i>Psittacula krameri</i>             | Captive | de Kloet & de Kloet, 2004    |
| JQ782201 | New Zealand  | 2012 | Yellow-crowned Parakeet | <i>Cyanoramphus auriceps</i>          | Wild    | Massaso et al., 2012         |
| JQ782202 | New Zealand  | 2012 | Yellow-crowned Parakeet | <i>Cyanoramphus auriceps</i>          | Wild    | Massaso et al., 2012         |
| JQ782203 | New Zealand  | 2012 | Yellow-crowned Parakeet | <i>Cyanoramphus auriceps</i>          | Wild    | Massaso et al., 2012         |
| JQ782204 | New Zealand  | 2012 | Yellow-crowned Parakeet | <i>Cyanoramphus auriceps</i>          | Wild    | Massaso et al., 2012         |
| JQ782205 | New Zealand  | 2012 | Yellow-crowned Parakeet | <i>Cyanoramphus auriceps</i>          | Wild    | Massaso et al., 2012         |
| JQ782206 | New Zealand  | 2012 | Yellow-crowned Parakeet | <i>Cyanoramphus auriceps</i>          | Wild    | Massaso et al., 2012         |
| JQ782207 | New Zealand  | 2012 | Yellow-crowned Parakeet | <i>Cyanoramphus auriceps</i>          | Wild    | Massaso et al., 2012         |
| JQ782208 | New Zealand  | 2012 | Yellow-crowned Parakeet | <i>Cyanoramphus auriceps</i>          | Wild    | Massaso et al., 2012         |
| JX221001 | Poland       | 2010 | Ring-necked parakeet    | <i>Psittacula krameri</i>             | Captive | Julian et al., 2013          |
| JX221002 | Poland       | 2010 | Ring-necked parakeet    | <i>Psittacula krameri</i>             | Captive | Julian et al., 2013          |
| JX221003 | Poland       | 2010 | Ring-necked parakeet    | <i>Psittacula krameri</i>             | Captive | Julian et al., 2013          |
| JX221004 | Poland       | 2010 | Budgerigar              | <i>Melopsittacus undulatus</i>        | Captive | Julian et al., 2013          |
| JX221005 | Poland       | 2010 | Budgerigar              | <i>Melopsittacus undulatus</i>        | Captive | Julian et al., 2013          |
| JX221006 | Poland       | 2010 | Crimson rosella         | <i>Platycercus elegans</i>            | Captive | Julian et al., 2013          |
| JX221007 | Poland       | 2011 | Ring-necked parakeet    | <i>Psittacula krameri</i>             | Captive | Julian et al., 2013          |
| JX221008 | Poland       | 2011 | Ring-necked parakeet    | <i>Psittacula krameri</i>             | Captive | Julian et al., 2013          |
| JX221009 | Poland       | 2011 | Budgerigar              | <i>Melopsittacus undulatus</i>        | Captive | Julian et al., 2013          |
| JX221010 | Poland       | 2011 | Ring-necked parakeet    | <i>Psittacula krameri</i>             | Captive | Julian et al., 2013          |
| JX221011 | Poland       | 2011 | Ring-necked parakeet    | <i>Psittacula krameri</i>             | Captive | Julian et al., 2013          |
| JX221012 | Poland       | 2011 | Budgerigar              | <i>Melopsittacus undulatus</i>        | Captive | Julian et al., 2013          |
| JX221013 | Poland       | 2003 | Cape Parrot             | <i>Poicephalus robustus</i>           | Captive | Julian et al., 2013          |
| JX221014 | Poland       | 2005 | Budgerigar              | <i>Melopsittacus undulatus</i>        | Captive | Julian et al., 2013          |
| JX221015 | Poland       | 2006 | Red-winged parrot       | <i>Aprosmictus erythropterus</i>      | Captive | Julian et al., 2013          |
| JX221016 | Poland       | 2006 | Red-winged parrot       | <i>Aprosmictus erythropterus</i>      | Captive | Julian et al., 2013          |
| JX221017 | Poland       | 2007 | Ring-necked parakeet    | <i>Psittacula krameri</i>             | Captive | Julian et al., 2013          |
| JX221018 | Poland       | 2007 | African grey parrot     | <i>Psittacus erithacus</i>            | Captive | Julian et al., 2013          |
| JX221019 | Poland       | 2007 | Ring-necked parakeet    | <i>Psittacula krameri</i>             | Captive | Julian et al., 2013          |
| JX221020 | Poland       | 2007 | African grey parrot     | <i>Psittacus erithacus</i>            | Captive | Julian et al., 2013          |
| JX221021 | Poland       | 2007 | Orange-winged Amazon    | <i>Amazona amazonica</i>              | Captive | Julian et al., 2013          |
| JX221022 | Poland       | 2007 | African grey parrot     | <i>Psittacus erithacus</i>            | Captive | Julian et al., 2013          |
| JX221023 | Poland       | 2007 | African grey parrot     | <i>Psittacus erithacus</i>            | Captive | Julian et al., 2013          |
| JX221024 | Poland       | 2007 | Pacific parrotlet       | <i>Forpus coelestis</i>               | Captive | Julian et al., 2013          |



|          |        |      |                        |                                |         |                     |
|----------|--------|------|------------------------|--------------------------------|---------|---------------------|
| JX221025 | Poland | 2007 | White cockatoo         | <i>Cacatua alba</i>            | Captive | Julian et al., 2013 |
| JX221026 | Poland | 2007 | Budgerigar             | <i>Melopsittacus undulatus</i> | Captive | Julian et al., 2013 |
| JX221027 | Poland | 2007 | Budgerigar             | <i>Melopsittacus undulatus</i> | Captive | Julian et al., 2013 |
| JX221028 | Poland | 2007 | Budgerigar             | <i>Melopsittacus undulatus</i> | Captive | Julian et al., 2013 |
| JX221029 | Poland | 2008 | Australian king parrot | <i>Alisterus scapularis</i>    | Captive | Julian et al., 2013 |
| JX221030 | Poland | 2008 | Senegal Parrot         | <i>Poicephalus senegalus</i>   | Captive | Julian et al., 2013 |
| JX221031 | Poland | 2008 | Senegal Parrot         | <i>Poicephalus senegalus</i>   | Captive | Julian et al., 2013 |
| JX221032 | Poland | 2008 | African grey parrot    | <i>Psittacus erithacus</i>     | Captive | Julian et al., 2013 |
| JX221033 | Poland | 2008 | Australian king parrot | <i>Alisterus scapularis</i>    | Captive | Julian et al., 2013 |
| JX221034 | Poland | 2008 | Budgerigar             | <i>Melopsittacus undulatus</i> | Captive | Julian et al., 2013 |
| JX221035 | Poland | 2008 | Eastern rosella        | <i>Platycercus eximius</i>     | Captive | Julian et al., 2013 |
| JX221036 | Poland | 2008 | Alexandrine parakeet   | <i>Psittacula eupatria</i>     | Captive | Julian et al., 2013 |
| JX221037 | Poland | 2008 | African grey parrot    | <i>Psittacus erithacus</i>     | Captive | Julian et al., 2013 |
| JX221038 | Poland | 2008 | African grey parrot    | <i>Psittacus erithacus</i>     | Captive | Julian et al., 2013 |
| JX221039 | Poland | 2008 | African grey parrot    | <i>Psittacus erithacus</i>     | Captive | Julian et al., 2013 |
| JX221040 | Poland | 2008 | Blue-fronted Amazon    | <i>Amazona aestiva</i>         | Captive | Julian et al., 2013 |
| JX221041 | Poland | 2009 | African grey parrot    | <i>Psittacus erithacus</i>     | Captive | Julian et al., 2013 |
| JX221042 | Poland | 2009 | Alexandrine parakeet   | <i>Psittacula eupatria</i>     | Captive | Julian et al., 2013 |
| JX221043 | Poland | 2009 | Crimson rosella        | <i>Platycercus elegans</i>     | Captive | Julian et al., 2013 |
